# Supplementary material for: Fabrication and Characterization of Electrospun Poly(acrylonitrile-co-Methyl Acrylate)/Lignin Nanofibers: Effects of Lignin Type and Total Polymer Concentration
Source: PubMed Central journal article supplement (PMC8037837; doi:10.3390/polym13070992), 2021-03-24
Supplement: polymers-13-00992-s001.pdf [file polymers-13-00992-s001.pdf]

## SUPPORTING INFORMATION

### Fabrication and Characterization of Electrospun Poly(acrylonitrile-*co*-Methyl Acrylate)/Lignin Nanofibers: Effects of Lignin Type and Total Polymer Concentration

Suchitha Devadas<sup>1</sup>, Saja M. Nabat Al-Ajrash<sup>1</sup>, Donald A. Klosterman<sup>1</sup>, Kenya M. Crosson<sup>2,3</sup>, Garry S. Crosson<sup>4</sup> and Erick S. Vasquez<sup>1,3,\*</sup>

<sup>1</sup> Department of Chemical and Materials Engineering

<sup>2</sup> Department of Civil and Environmental Engineering and Engineering Mechanics

<sup>3</sup> Integrative Science and Engineering Center

<sup>4</sup> Department of Chemistry

University of Dayton, Dayton, OH, 45469,

\* Correspondence: [evasquez1@udayton.edu](mailto:evasquez1@udayton.edu) ; Tel.: +1(937)-229-2627

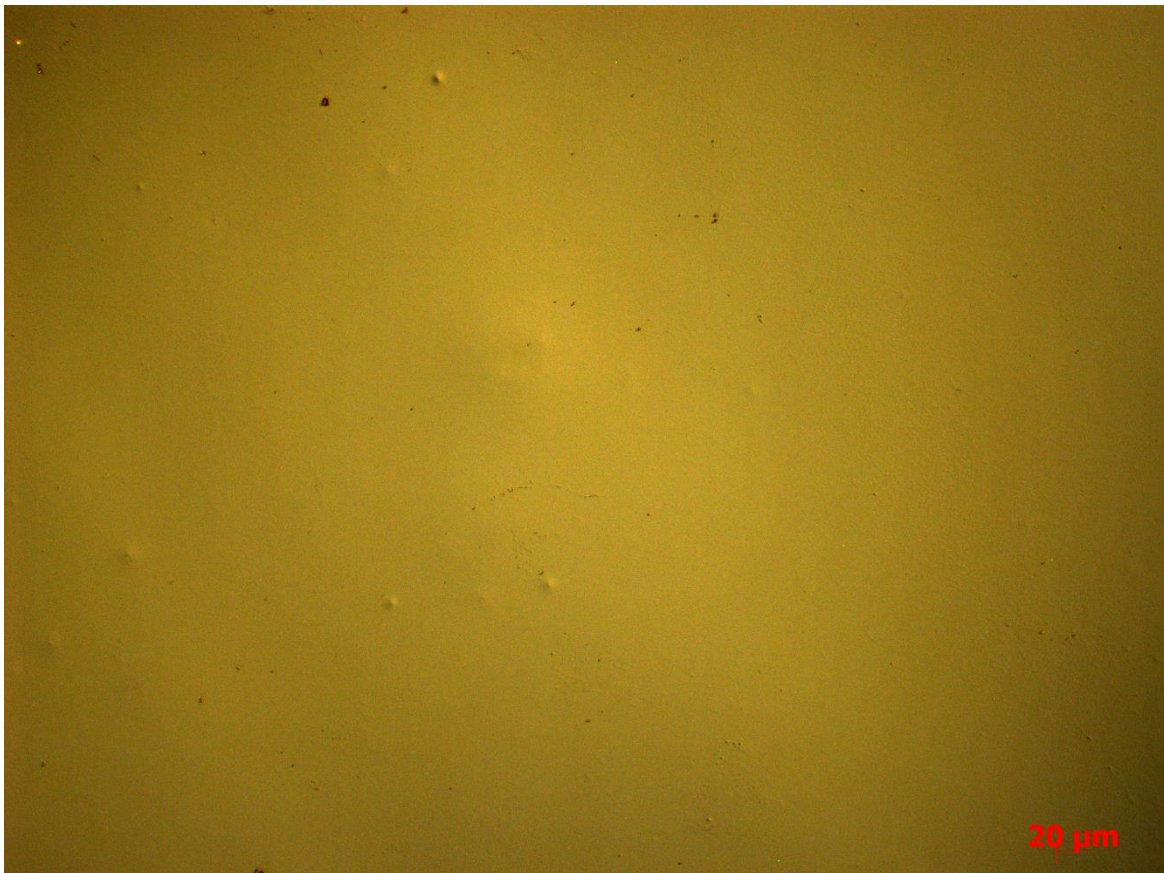

**Figure S1:** Polarized light optical microscopy image of PAN-*co*-MA dried films

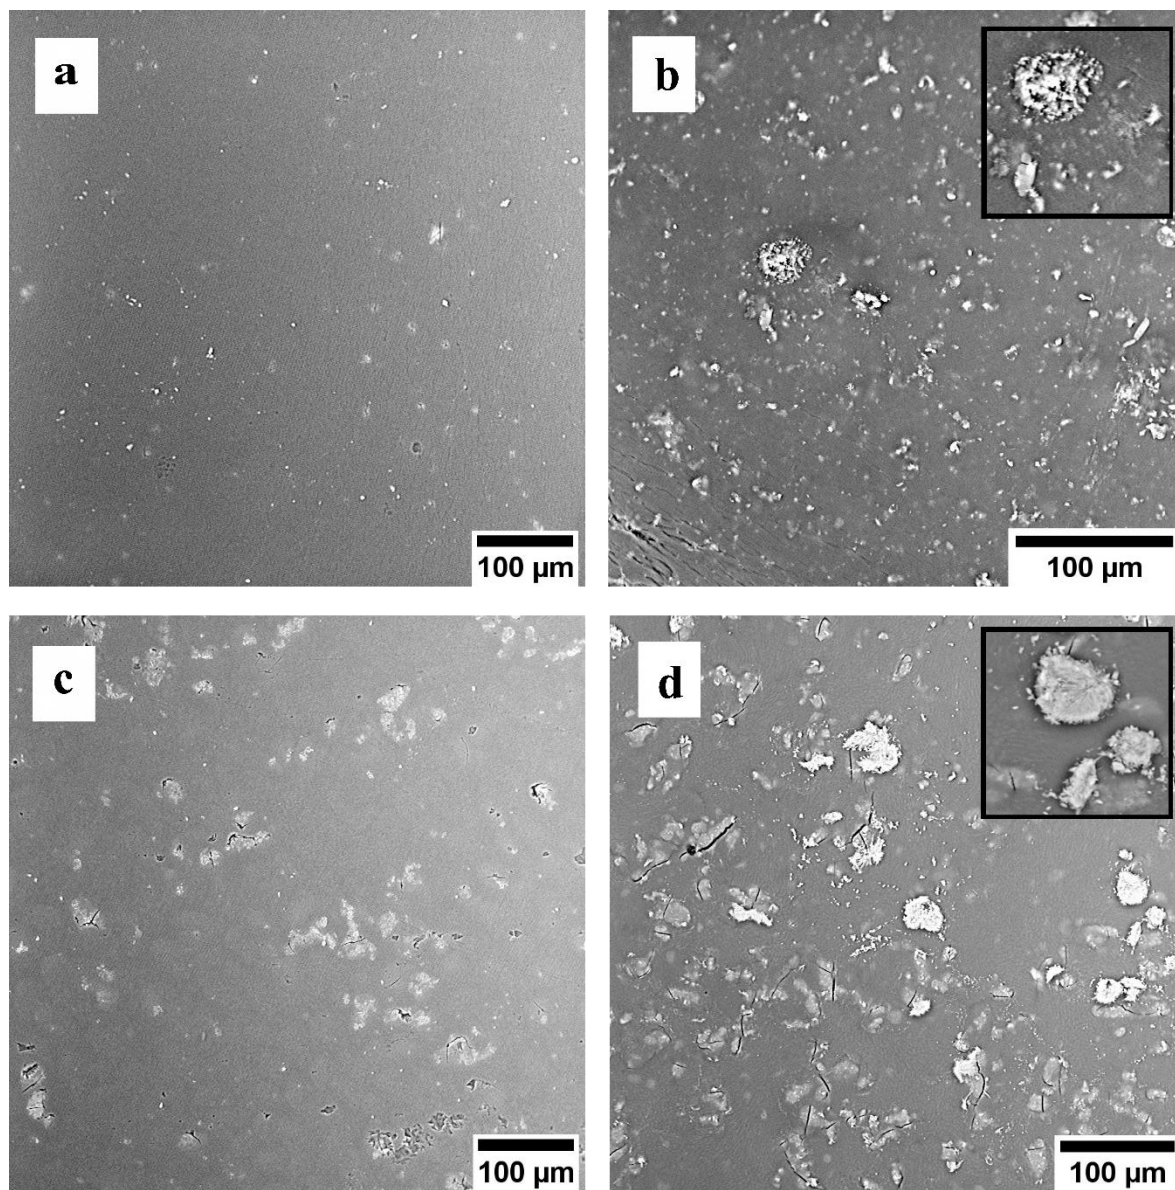

**Figure S2:** SEM image of polymer solution blend film; (a) AL-1, (b) LSL-1, (c) AL-2 and (d) LSL-2. Inset in b and d shows enlarged LSL clusters at 10 μm. Inset in b and d shows clusters formed at 10 μm.

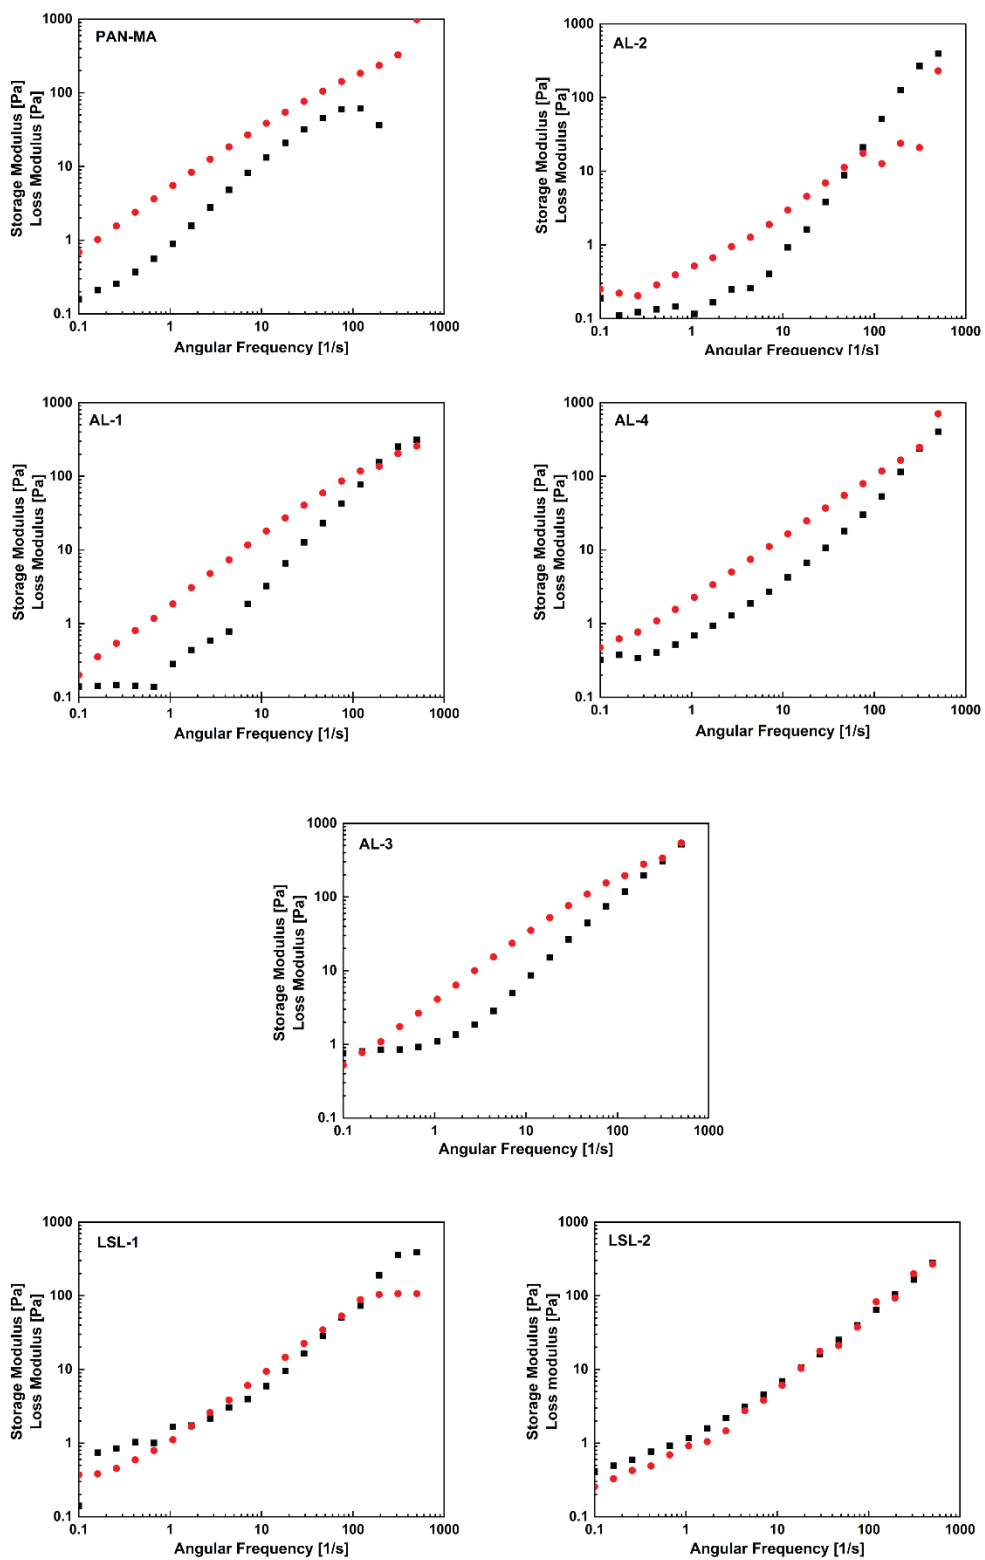

**Figure S3:** Frequency sweep data of storage modulus ( $G'$ ) (black dots) and loss modulus ( $G''$ ) (red dots) for PAN-MA/lignin blends, collected at a 1 % strain amplitude.

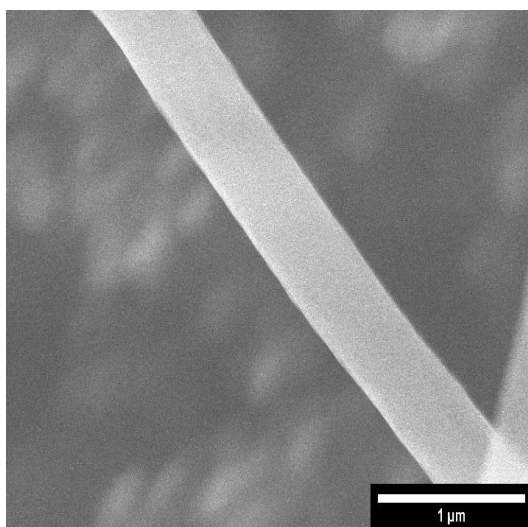

**Figure S4:** HR-SEM image of AL-1 nanofibers showing smooth structure.

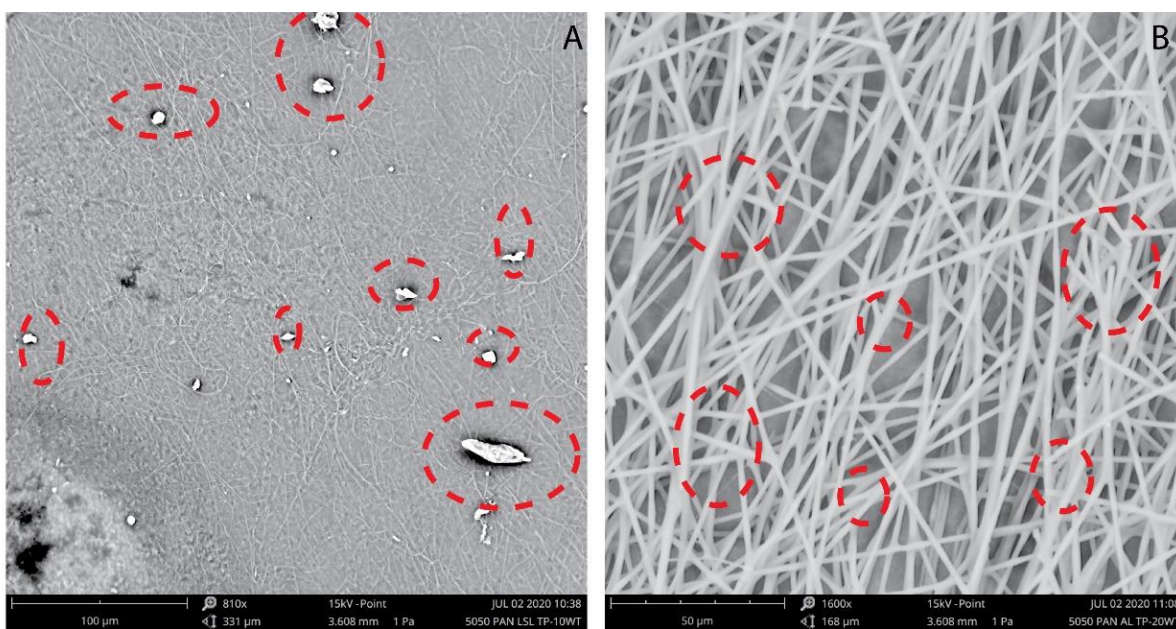

**Figure S5:** Low-magnification SEM images of LSL-2 and AL-4 samples show (A) large aggregates were present during the electrospinning of LSL-2 samples and (B) inter-fiber bonding was observed for sample AL-4



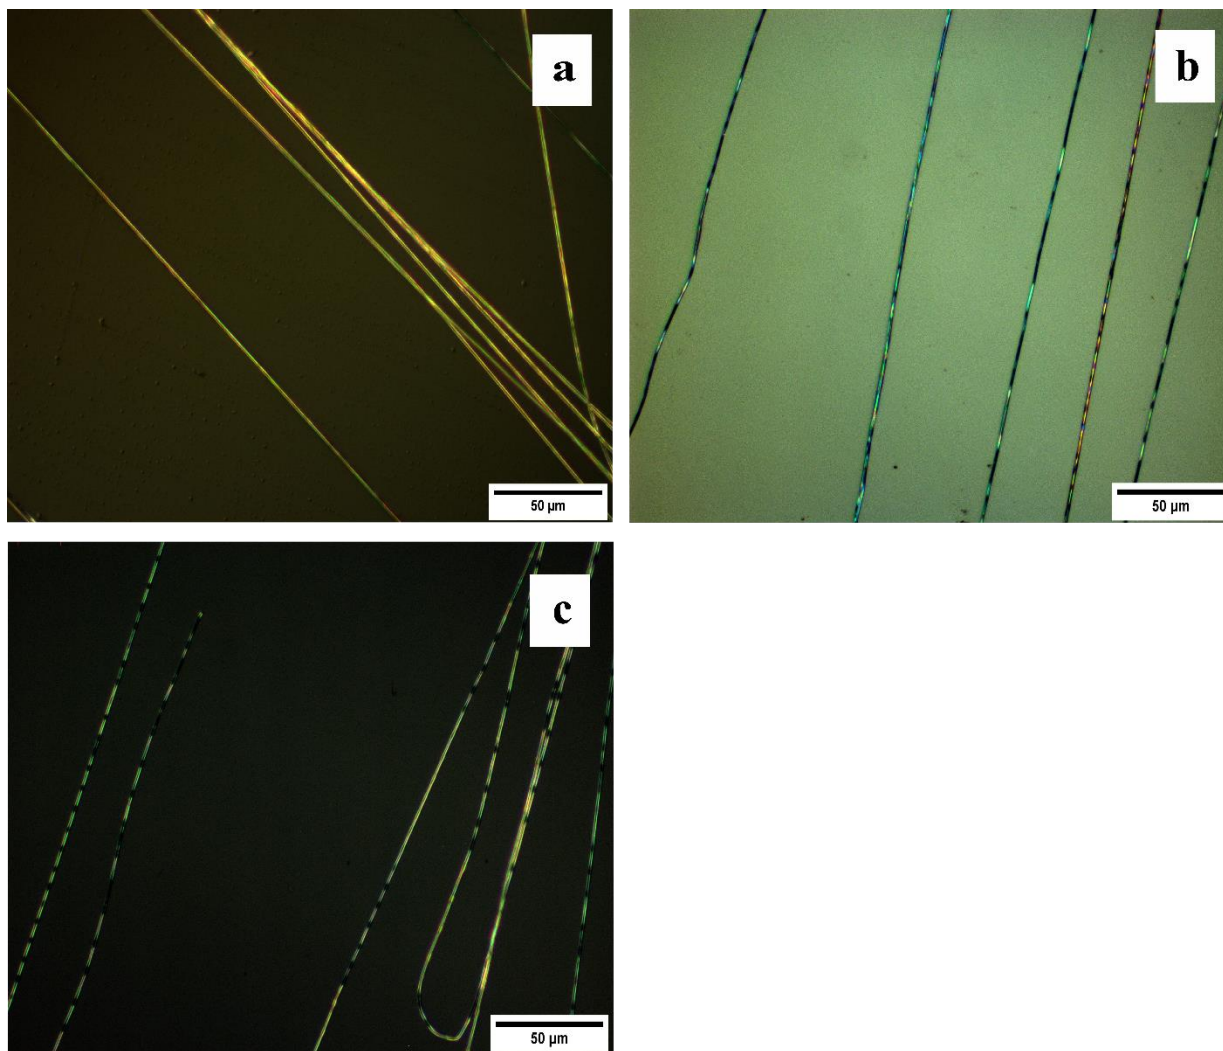

**Figure S6:** Polarized optical light microscopy images of electrospun nanofibers at 50 magnification for (a) PAN-MA; (b) AL-1; and (c) AL-3 samples.

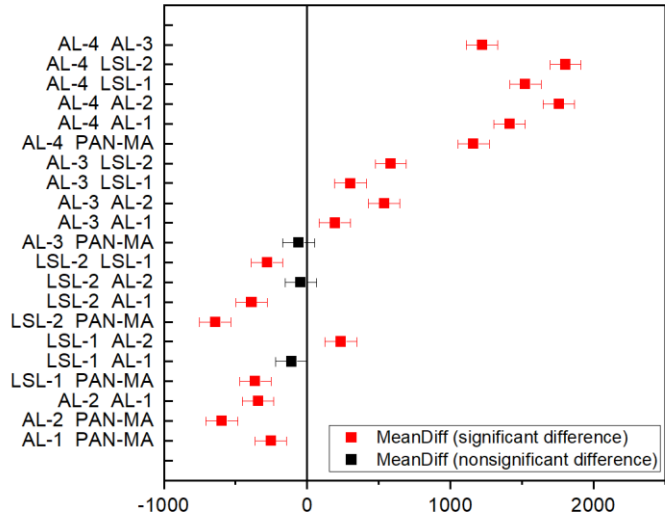

**Figure S7:** One-way ANOVA (Tukey's) test to estimate significant differences for electrospun nanofiber diameters based on SEM measurements

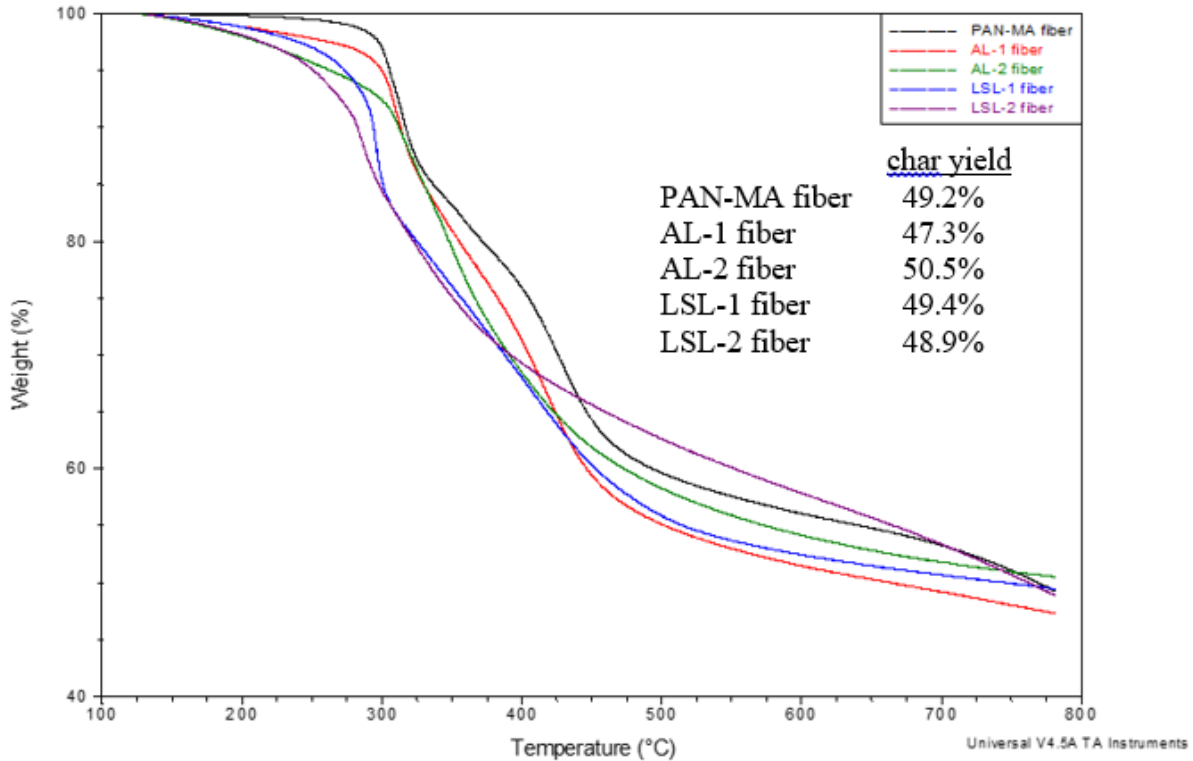

**Figure S8:** Compiled TGA weight loss results for electrospun fibers.

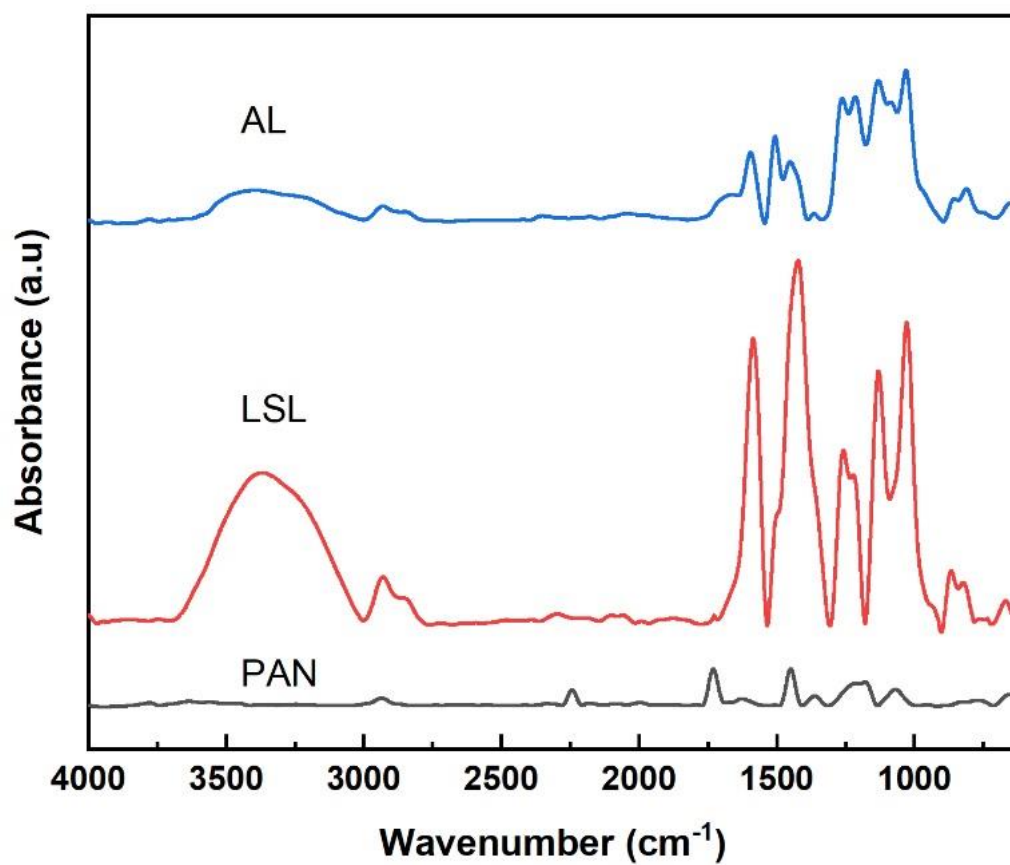

**Figure S9:** Full FTIR spectra for AL-1, LSL-1 and PAN-MA control sample (referred as PAN in the plot)
